# Supplementary material
Source: Royal Society of Chemistry journal article supplement (doi:10.1039/d6em00310a)
Supplement: d6em00310a1.pdf [file d6em00310a1.pdf]

1

## Supplementary Material

2 **Transport Behavior of Polystyrene Nanoplastics in Saturated Quartz**

3 **Sand: Coupled Experimental and Modeling Approaches**

4 Xiaoyi Chen <sup>a1</sup>, Yuexin Yang <sup>a1</sup>, Cheng Peng <sup>a, d\*</sup>, Chengpeng Su <sup>a</sup>, Weiyu Liang <sup>a</sup>,

5 Chensi Shen <sup>c,d</sup>, Lijuan Sun <sup>b\*</sup>, Wei Zhang <sup>a</sup>

6

7 *<sup>a</sup>Key Laboratory of Environmental Risk Assessment and Control on Chemical*

8 *Process, Ministry of Ecology and Environment, School of Resource and*

9 *Environmental Engineering East China University of Science and Technology,*

10 *Shanghai 200237, China*

11 *<sup>b</sup>ECO-Environment Protection Research Institute, Shanghai Academy of Agricultural*

12 *Sciences, Shanghai 201403, China*

13 *<sup>c</sup>College of Environmental Science and Engineering, Donghua University, Shanghai*

14 *201620, China*

15 *<sup>d</sup>Shanghai Institute of Pollution Control and Ecological Security, Shanghai 200092,*

16 *China*

17

18 \*Corresponding author.

19 Email: Cheng Peng ([cpeng@ecust.edu.cn](mailto:cpeng@ecust.edu.cn)); Lijuan Sun ([sunliuliu2012@126.com](mailto:sunliuliu2012@126.com)).

20

21

22 Equation: 1

23 Tables: 13

24 Figures: 2

25 **Equation**

26 Equation S1

$$k^{-1} = \sqrt{\frac{\epsilon_r \epsilon_0 k_B T}{2N_A e^2 I}}$$

27

28 The definitions of all symbols used in the equations are provided in Table S3.

29

31 **Tables**

32 Table S1 Background solution conditions and influencing factors set for PS NPs

33 transport experiments in saturated quartz sand columns

| Solute Type | Cation Valence State | pH  | IS (mmol/L) | C <sub>0</sub> (mg/L) | Flow Rate (mL/min) |
|-------------|----------------------|-----|-------------|-----------------------|--------------------|
|             | NaCl                 | 5.5 | 1           | 10                    | 1                  |
|             | NaCl                 | 5.5 | 10          | 10                    | 1                  |
|             | NaCl                 | 5.5 | 100         | 10                    | 1                  |
|             | NaCl                 | 7.5 | 1           | 10                    | 1                  |
|             | NaCl                 | 7.5 | 10          | 10                    | 1                  |
|             | NaCl                 | 7.5 | 100         | 10                    | 1                  |
|             | NaCl                 | 9.5 | 1           | 10                    | 1                  |
| PS NPs PS   | NaCl                 | 9.5 | 10          | 10                    | 1                  |
| NPs-8 PS    | NaCl                 | 5.5 | 1           | 10                    | 0.5                |
| NPs-24 PS   | NaCl                 | 5.5 | 10          | 10                    | 0.5                |
| NPs-800     | NaCl                 | 5.5 | 1           | 10                    | 2                  |
|             | NaCl                 | 5.5 | 10          | 10                    | 2                  |
|             | NaCl                 | 5.5 | 1           | 5                     | 1                  |
|             | NaCl                 | 5.5 | 10          | 5                     | 1                  |
|             | NaCl                 | 5.5 | 1           | 20                    | 1                  |
|             | NaCl                 | 5.5 | 10          | 20                    | 1                  |
|             | CaCl <sub>2</sub>    | 5.5 | 1           | 10                    | 1                  |
|             | CaCl <sub>2</sub>    | 5.5 | 10          | 10                    | 1                  |

35 Table S2 Fitted parameters of BTC for Br.

| Flow Rate<br>(mL/min) | Darcy Velocity<br>(cm/min) | Adsorption Isotherm<br>Coefficient (cm/min) | Dispersion<br>Coefficient<br>(cm <sup>2</sup> /min) | R <sup>2</sup> |
|-----------------------|----------------------------|---------------------------------------------|-----------------------------------------------------|----------------|
| 1                     | 0.566                      | 0.785                                       | 0.0986                                              | 0.996          |

36

37 Table S3 Parameters and significance in the DLVO force calculation equation

| Parameter    | Meaning                                                                                                    |
|--------------|------------------------------------------------------------------------------------------------------------|
| $V_{TOT}$    | Total interaction energy                                                                                   |
| $V_{VDW}$    | Van der Waals potential energy                                                                             |
| $V_{EDL}$    | Electrostatic repulsion potential energy                                                                   |
| $r$          | Radius of PS NPs (m)                                                                                       |
| $h$          | Separation distance between PS NPs and porous medium surface (nm)                                          |
| $\lambda$    | Characteristic wavelength of interaction force (typically 100 nm)                                          |
| $\epsilon_0$ | Vacuum permittivity ( $8.854 \times 10^{-12}$ F/m)                                                         |
| $\epsilon_r$ | Relative permittivity of water (78.5, dimensionless)                                                       |
| $\phi_1$     | Zeta potential of PS NPs (mV)                                                                              |
| $\phi_2$     | Zeta potential of quartz sand (mV)                                                                         |
| $k$          | Reciprocal of Debye length (m <sup>-1</sup> ), $k = \sqrt{\frac{2N_A e^2 I}{\epsilon_r \epsilon_0 k_B T}}$ |
| $I$          | Ionic strength (mol/L), $I = \frac{1}{2} \sum_{i=1}^n c_i z_i^2$                                           |
| $N_A$        | Avogadro's constant ( $6.02 \times 10^{23}$ mol <sup>-1</sup> )                                            |
| $T$          | Temperature in Kelvin (298 K)                                                                              |
| $e$          | Elementary charge ( $-1.602 \times 10^{-19}$ C)                                                            |
| $c_i$        | Concentration of ion i (mol/L)                                                                             |
| $z_i$        | Valence of ion i                                                                                           |
| $n$          | Number of ion species in the system                                                                        |
| $k_B$        | Boltzmann constant ( $1.381 \times 10^{-23}$ J/K)                                                          |
| $A_{11}$     | Hamaker constant of PS NPs ( $6.60 \times 10^{-20}$ J)                                                     |

---

|           |                                                               |
|-----------|---------------------------------------------------------------|
| $A_{22}$  | Hamaker constant of quartz sand ( $8.86 \times 10^{-20}$ J)   |
| $A_{33}$  | Hamaker constant of water ( $3.7 \times 10^{-20}$ J)          |
| $A_{132}$ | Combined Hamaker constant for PS NPs–water–quartz sand system |

---

39 Table S4 Zeta potential and particle size of PS NPs under different physicochemical  
 40 conditions

| Solute Type | Cationic valence  | pH  | IS (mmol/L) | PS NPs Concentration (mg/L) | Zeta Potential (mV) | Particle Size (nm) |
|-------------|-------------------|-----|-------------|-----------------------------|---------------------|--------------------|
| PS NPs      | NaCl              | 5.5 | 1           | 10                          | -16.20              | 110.72             |
|             | NaCl              | 5.5 | 10          | 10                          | -10.63              | 103.92             |
|             | NaCl              | 5.5 | 100         | 10                          | -3.36               | 509.45             |
|             | NaCl              | 7.5 | 1           | 10                          | -16.79              | 105.25             |
|             | NaCl              | 7.5 | 10          | 10                          | -11.93              | 102.10             |
|             | NaCl              | 7.5 | 100         | 10                          | -4.35               | 1527.24            |
|             | NaCl              | 9.5 | 1           | 10                          | -19.86              | 103.09             |
|             | NaCl              | 9.5 | 10          | 10                          | -12.34              | 100.74             |
|             | NaCl              | 5.5 | 1           | 5                           | -13.37              | 100.39             |
|             | NaCl              | 5.5 | 10          | 5                           | -8.98               | 104.33             |
|             | NaCl              | 5.5 | 1           | 20                          | -20.89              | 105.97             |
|             | NaCl              | 5.5 | 10          | 20                          | -15.33              | 106.26             |
|             | CaCl <sub>2</sub> | 5.5 | 1           | 10                          | -11.33              | 108.60             |
|             | CaCl <sub>2</sub> | 5.5 | 10          | 10                          | -9.33               | 829.85             |

41

42

43 Table S5 Zeta potential and particle size of PS NPs-8 under different physicochemical  
 44 conditions

| Solute Type | Cationic valence  | pH  | IS (mmol/L) | PS NPs Concentration (mg/L) | Zeta Potential (mV) | Particle Size (nm) |
|-------------|-------------------|-----|-------------|-----------------------------|---------------------|--------------------|
| PS NPs-8    | NaCl              | 5.5 | 1           | 10                          | -18.74              | 99.75              |
|             | NaCl              | 5.5 | 10          | 10                          | -14.77              | 99.47              |
|             | NaCl              | 7.5 | 1           | 10                          | -19.60              | 99.63              |
|             | NaCl              | 7.5 | 10          | 10                          | -16.83              | 98.76              |
|             | NaCl              | 9.5 | 1           | 10                          | -20.00              | 101.27             |
|             | NaCl              | 9.5 | 10          | 10                          | -17.20              | 97.29              |
|             | NaCl              | 5.5 | 1           | 5                           | -17.93              | 100.72             |
|             | NaCl              | 5.5 | 10          | 5                           | -11.78              | 99.61              |
|             | NaCl              | 5.5 | 1           | 20                          | -21.45              | 100.21             |
|             | NaCl              | 5.5 | 10          | 20                          | -16.24              | 98.71              |
|             | CaCl <sub>2</sub> | 5.5 | 1           | 10                          | -14.50              | 97.71              |
|             | CaCl <sub>2</sub> | 5.5 | 10          | 10                          | -9.56               | 219.42             |

45

46

47 Table S6 Zeta potential and particle size of PS NPs-24 under different physicochemical  
 48 conditions

| Solute Type | Cationic valence  | pH  | IS (mmol/L) | PS NPs Concentration (mg/L) | Zeta Potential (mV) | Particle Size (nm) |
|-------------|-------------------|-----|-------------|-----------------------------|---------------------|--------------------|
| PS NPs-24   | NaCl              | 5.5 | 1           | 10                          | -20.34              | 97.37              |
|             | NaCl              | 5.5 | 10          | 10                          | -17.13              | 94.47              |
|             | NaCl              | 7.5 | 1           | 10                          | -20.98              | 96.15              |
|             | NaCl              | 7.5 | 10          | 10                          | -17.95              | 95.19              |
|             | NaCl              | 9.5 | 1           | 10                          | -22.61              | 98.23              |
|             | NaCl              | 9.5 | 10          | 10                          | -18.90              | 94.40              |
|             | NaCl              | 5.5 | 1           | 5                           | -19.19              | 97.44              |
|             | NaCl              | 5.5 | 10          | 5                           | -15.13              | 95.73              |
|             | NaCl              | 5.5 | 1           | 20                          | -22.14              | 96.21              |
|             | NaCl              | 5.5 | 10          | 20                          | -18.99              | 95.66              |
|             | CaCl <sub>2</sub> | 5.5 | 1           | 10                          | -15.20              | 94.28              |
|             | CaCl <sub>2</sub> | 5.5 | 10          | 10                          | -10.61              | 195.41             |

49

50

51 Table S7 Zeta potential and particle size of PS NPs-800 under different physicochemical  
 52 conditions

| Solute Type | Cationic valence  | pH  | IS (mmol/L) | PS NPs Concentration (mg/L) | Zeta Potential (mV) | Particle Size (nm) |
|-------------|-------------------|-----|-------------|-----------------------------|---------------------|--------------------|
| PS NPs-800  | NaCl              | 5.5 | 1           | 10                          | -36.75              | 956.00             |
|             | NaCl              | 5.5 | 10          | 10                          | -16.23              | 1028.58            |
|             | NaCl              | 7.5 | 1           | 10                          | -49.46              | 924.95             |
|             | NaCl              | 7.5 | 10          | 10                          | -31.59              | 925.68             |
|             | NaCl              | 9.5 | 1           | 10                          | -54.52              | 935.86             |
|             | NaCl              | 9.5 | 10          | 10                          | -45.50              | 921.29             |
|             | NaCl              | 5.5 | 1           | 5                           | -24.38              | 804.82             |
|             | NaCl              | 5.5 | 10          | 5                           | -6.75               | 1204.64            |
|             | NaCl              | 5.5 | 1           | 20                          | -44.72              | 908.59             |
|             | NaCl              | 5.5 | 10          | 20                          | -27.49              | 1196.42            |
|             | CaCl <sub>2</sub> | 5.5 | 1           | 10                          | -16.63              | 1117.01            |
|             | CaCl <sub>2</sub> | 5.5 | 10          | 10                          | -8.87               | 1622.52            |

53

54

55 Table S8 Zeta potential of quartz sand under different physicochemical conditions

| Media Type  | Cationic valence  | pH  | IS (mmol/L) | Zeta Potential (mV) |
|-------------|-------------------|-----|-------------|---------------------|
| Quartz sand | NaCl              | 5.5 | 1           | -21.78              |
|             | NaCl              | 5.5 | 10          | -16.84              |
|             | NaCl              | 5.5 | 100         | -9.72               |
|             | NaCl              | 7.5 | 1           | -22.74              |
|             | NaCl              | 7.5 | 10          | -17.18              |
|             | NaCl              | 7.5 | 100         | -10.80              |
|             | NaCl              | 9.5 | 1           | -24.04              |
|             | NaCl              | 9.5 | 10          | -20.46              |
|             | CaCl <sub>2</sub> | 5.5 | 1           | -12.31              |
|             | CaCl <sub>2</sub> | 5.5 | 10          | -8.35               |

57 Table S9 Fitted parameters of PS NPs transport in the quartz sand columns obtained by Hydrus-1D

| Number | Solute Type | Cationic valence  | pH  | IS (mmol/L) | C <sub>0</sub> (mg/L) | Flow rate (mL/min) | k <sub>1a</sub> <sup>1</sup> (min <sup>-1</sup> ) | k <sub>1d</sub> <sup>2</sup> (min <sup>-1</sup> ) | k <sub>2a</sub> <sup>3</sup> (min <sup>-1</sup> ) | S <sub>max2</sub> <sup>4</sup> (mg/kg) | Penetration (%) | R <sup>2</sup> |
|--------|-------------|-------------------|-----|-------------|-----------------------|--------------------|---------------------------------------------------|---------------------------------------------------|---------------------------------------------------|----------------------------------------|-----------------|----------------|
| 1      |             | NaCl              | 5.5 | 1           | 10                    | 1                  | 9.292                                             | 3.487                                             | 0.0524                                            | 0.405                                  | 84.483          | 0.9912         |
| 2      |             | NaCl              | 5.5 | 10          | 10                    | 1                  | 3.167                                             | 1.418                                             | 0.1428                                            | 0.901                                  | 64.784          | 0.9846         |
| 3      |             | NaCl              | 5.5 | 100         | 10                    | 1                  | NA                                                | NA                                                | NA                                                | NA                                     | 11.697          | 0.9641*        |
| 4      |             | NaCl              | 7.5 | 1           | 10                    | 1                  | 6.481                                             | 2.532                                             | 0.0500                                            | 0.357                                  | 85.965          | 0.9936         |
| 5      |             | NaCl              | 7.5 | 10          | 10                    | 1                  | 4.216                                             | 1.882                                             | 0.1514                                            | 0.840                                  | 66.046          | 0.9902         |
| 6      |             | NaCl              | 7.5 | 100         | 10                    | 1                  | NA                                                | NA                                                | NA                                                | NA                                     | 14.913          | 0.9125*        |
| 7      |             | NaCl              | 9.5 | 1           | 10                    | 1                  | 9.774                                             | 4.317                                             | 0.0377                                            | 0.323                                  | 87.946          | 0.9983         |
| 8      |             | NaCl              | 9.5 | 10          | 10                    | 1                  | 6.489                                             | 2.937                                             | 0.1100                                            | 0.773                                  | 70.359          | 0.9919         |
| 9      | PS NPs      | NaCl              | 5.5 | 1           | 10                    | 0.5                | 5.207                                             | 2.369                                             | 0.1447                                            | 0.488                                  | 78.768          | 0.9852         |
| 10     |             | NaCl              | 5.5 | 10          | 10                    | 0.5                | 6.540                                             | 2.924                                             | 0.1464                                            | 0.934                                  | 63.695          | 0.9970         |
| 11     |             | NaCl              | 5.5 | 1           | 10                    | 2                  | 8.731                                             | 3.777                                             | 0.0341                                            | 0.323                                  | 88.358          | 0.9980         |
| 12     |             | NaCl              | 5.5 | 10          | 10                    | 2                  | 4.287                                             | 1.881                                             | 0.1321                                            | 0.698                                  | 71.282          | 0.9932         |
| 13     |             | NaCl              | 5.5 | 1           | 5                     | 1                  | 4.701                                             | 2.048                                             | 0.0983                                            | 0.485                                  | 79.604          | 0.9931         |
| 14     |             | NaCl              | 5.5 | 10          | 5                     | 1                  | 4.761                                             | 2.184                                             | 0.1771                                            | 1.024                                  | 59.526          | 0.9949         |
| 15     |             | NaCl              | 5.5 | 1           | 20                    | 1                  | 8.720                                             | 3.876                                             | 0.0309                                            | 0.311                                  | 89.046          | 0.9975         |
| 16     |             | NaCl              | 5.5 | 10          | 20                    | 1                  | 6.845                                             | 3.047                                             | 0.0757                                            | 0.496                                  | 80.255          | 0.9936         |
| 17     |             | CaCl <sub>2</sub> | 5.5 | 1           | 10                    | 1                  | 5.323                                             | 2.434                                             | 0.2629                                            | 1.354                                  | 46.569          | 0.9949         |

---

|    |                   |     |    |    |   |    |    |    |    |       |         |
|----|-------------------|-----|----|----|---|----|----|----|----|-------|---------|
| 18 | CaCl <sub>2</sub> | 5.5 | 10 | 10 | 1 | NA | NA | NA | NA | 6.790 | 0.9908* |
|----|-------------------|-----|----|----|---|----|----|----|----|-------|---------|

---

58 Note: <sup>1</sup> represents the first-order attachment coefficient at site 1, <sup>2</sup> represents the first-order desorption coefficient at site 1, <sup>3</sup> represents the first-order  
59 attachment coefficient at site 2, and <sup>4</sup> represents the maximum solid-phase retention concentration of the colloid at site 2. NA indicates that valid data  
60 could not be fitted using the two-site kinetic retention model (the two-site model is no longer applicable under these experimental conditions). \*  
61 indicates that the breakthrough curve for this set of experimental data was fitted using the single-site adsorption model.

62

63 Table 10 Fitted parameters of PS NPs-800 transport in the quartz sand columns obtained by Hydrus-1D

| Number | Solute Type | Cationic valence  | pH  | IS (mmol/L) | C <sub>0</sub> (mg/L) | Flow rate (mL/min) | k <sub>1a</sub> <sup>1</sup> (min <sup>-1</sup> ) | k <sub>1d</sub> <sup>2</sup> (min <sup>-1</sup> ) | k <sub>2a</sub> <sup>3</sup> (min <sup>-1</sup> ) | S <sub>max2</sub> <sup>4</sup> (mg/kg) | Penetration n (%) | R <sup>2</sup> |
|--------|-------------|-------------------|-----|-------------|-----------------------|--------------------|---------------------------------------------------|---------------------------------------------------|---------------------------------------------------|----------------------------------------|-------------------|----------------|
| 1      |             | NaCl              | 5.5 | 1           | 10                    | 1                  | 10.000                                            | 4.468                                             | 0.0431                                            | 2.298                                  | 75.286            | 0.9991         |
| 2      |             | NaCl              | 5.5 | 10          | 10                    | 1                  | 4.258                                             | 1.747                                             | 0.0711                                            | 6.390                                  | 60.829            | 0.9945         |
| 3      |             | NaCl              | 7.5 | 1           | 10                    | 1                  | 9.948                                             | 4.385                                             | 0.0380                                            | 2.836                                  | 77.143            | 0.9991         |
| 4      |             | NaCl              | 7.5 | 10          | 10                    | 1                  | 4.529                                             | 2.049                                             | 0.0644                                            | 3.966                                  | 64.782            | 0.9958         |
| 5      |             | NaCl              | 9.5 | 1           | 10                    | 1                  | 8.450                                             | 3.791                                             | 0.0400                                            | 1.847                                  | 77.299            | 0.9992         |
| 6      |             | NaCl              | 9.5 | 10          | 10                    | 1                  | 7.288                                             | 3.200                                             | 0.0587                                            | 3.664                                  | 67.314            | 0.9978         |
| 7      |             | NaCl              | 5.5 | 1           | 10                    | 0.5                | 6.241                                             | 2.828                                             | 0.0455                                            | 2.123                                  | 74.516            | 0.9965         |
| 8      | PS NPs-800  | NaCl              | 5.5 | 10          | 10                    | 0.5                | 3.751                                             | 1.642                                             | 0.0756                                            | 10.000                                 | 58.205            | 0.9954         |
| 9      |             | NaCl              | 5.5 | 1           | 10                    | 2                  | 10.000                                            | 4.305                                             | 0.0390                                            | 1.337                                  | 78.855            | 0.9984         |
| 10     |             | NaCl              | 5.5 | 10          | 10                    | 2                  | 9.774                                             | 4.299                                             | 0.0500                                            | 9.021                                  | 69.596            | 0.9988         |
| 11     |             | NaCl              | 5.5 | 1           | 5                     | 1                  | NA                                                | NA                                                | NA                                                | NA                                     | 38.203            | 0.9946*        |
| 12     |             | NaCl              | 5.5 | 10          | 5                     | 1                  | NA                                                | NA                                                | NA                                                | NA                                     | 32.521            | 0.9829*        |
| 13     |             | NaCl              | 5.5 | 1           | 20                    | 1                  | 10.000                                            | 4.510                                             | 0.0439                                            | 1.516                                  | 76.440            | 0.9988         |
| 14     |             | NaCl              | 5.5 | 10          | 20                    | 1                  | 9.708                                             | 4.699                                             | 0.0704                                            | 3.847                                  | 62.577            | 0.9986         |
| 15     |             | CaCl <sub>2</sub> | 5.5 | 1           | 10                    | 1                  | NA                                                | NA                                                | NA                                                | NA                                     | 47.054            | 0.9954*        |
| 16     |             | CaCl <sub>2</sub> | 5.5 | 10          | 10                    | 1                  | NA                                                | NA                                                | NA                                                | NA                                     | 38.023            | 0.9951*        |

64

65

66 Table 11 Fitted parameters of PS NPs-8 transport in the quartz sand columns obtained by Hydrus-1D

| Number | Solute Type | Cationic valence  | pH  | IS (mmol/L) | C <sub>0</sub> (mg/L) | Flow rate (mL/min) | k <sub>1a</sub> <sup>1</sup> (min <sup>-1</sup> ) | k <sub>1d</sub> <sup>2</sup> (min <sup>-1</sup> ) | k <sub>2a</sub> <sup>3</sup> (min <sup>-1</sup> ) | S <sub>max2</sub> <sup>4</sup> (mg/kg) | Penetration n (%) | R <sup>2</sup> |
|--------|-------------|-------------------|-----|-------------|-----------------------|--------------------|---------------------------------------------------|---------------------------------------------------|---------------------------------------------------|----------------------------------------|-------------------|----------------|
| 1      |             | NaCl              | 5.5 | 1           | 10                    | 1                  | 8.558                                             | 3.787                                             | 0.0336                                            | 0.388                                  | 87.185            | 0.9973         |
| 2      |             | NaCl              | 5.5 | 10          | 10                    | 1                  | 9.860                                             | 4.228                                             | 0.0784                                            | 0.724                                  | 74.534            | 0.9988         |
| 3      |             | NaCl              | 7.5 | 1           | 10                    | 1                  | 9.927                                             | 4.134                                             | 0.0294                                            | 0.348                                  | 88.577            | 0.9985         |
| 4      |             | NaCl              | 7.5 | 10          | 10                    | 1                  | 9.933                                             | 4.264                                             | 0.0480                                            | 0.531                                  | 82.337            | 0.9983         |
| 5      |             | NaCl              | 9.5 | 1           | 10                    | 1                  | 9.759                                             | 4.059                                             | 0.0281                                            | 0.340                                  | 88.950            | 0.9988         |
| 6      |             | NaCl              | 9.5 | 10          | 10                    | 1                  | 5.087                                             | 2.178                                             | 0.0405                                            | 0.478                                  | 84.475            | 0.9967         |
| 7      |             | NaCl              | 5.5 | 1           | 10                    | 0.5                | 9.933                                             | 4.498                                             | 0.0268                                            | 0.564                                  | 86.768            | 0.9985         |
| 8      | PS          | NaCl              | 5.5 | 10          | 10                    | 0.5                | 4.292                                             | 1.942                                             | 0.1464                                            | 0.822                                  | 66.809            | 0.9918         |
| 9      | NPs-8       | NaCl              | 5.5 | 1           | 10                    | 2                  | 10.000                                            | 4.216                                             | 0.0190                                            | 0.300                                  | 91.464            | 0.9983         |
| 10     |             | NaCl              | 5.5 | 10          | 10                    | 2                  | 9.903                                             | 4.264                                             | 0.0340                                            | 0.336                                  | 88.094            | 0.9988         |
| 11     |             | NaCl              | 5.5 | 1           | 5                     | 1                  | 9.716                                             | 4.220                                             | 0.0288                                            | 0.439                                  | 87.407            | 0.9990         |
| 12     |             | NaCl              | 5.5 | 10          | 5                     | 1                  | 6.430                                             | 2.873                                             | 0.1219                                            | 0.950                                  | 65.248            | 0.9951         |
| 13     |             | NaCl              | 5.5 | 1           | 20                    | 1                  | 9.572                                             | 4.292                                             | 0.0266                                            | 0.289                                  | 90.103            | 0.9980         |
| 14     |             | NaCl              | 5.5 | 10          | 20                    | 1                  | 10.000                                            | 4.445                                             | 0.0722                                            | 0.451                                  | 81.798            | 0.9957         |
| 15     |             | CaCl <sub>2</sub> | 5.5 | 1           | 10                    | 1                  | 8.575                                             | 3.642                                             | 0.0957                                            | 0.747                                  | 72.186            | 0.9884         |
| 16     |             | CaCl <sub>2</sub> | 5.5 | 10          | 10                    | 1                  | NA                                                | NA                                                | NA                                                | NA                                     | 12.617            | 0.9858*        |

68 Table 12 Fitted parameters of PS NPs-24 transport in the quartz sand columns obtained by Hydrus-1D

| Number | Solute Type | Cationic valence  | pH  | IS (mmol/L) | C <sub>0</sub> (mg/L) | Flow rate (mL/min) | k <sub>1a</sub> <sup>1</sup> (min <sup>-1</sup> ) | k <sub>1d</sub> <sup>2</sup> (min <sup>-1</sup> ) | k <sub>2a</sub> <sup>3</sup> (min <sup>-1</sup> ) | S <sub>max2</sub> <sup>4</sup> (mg/kg) | Penetration n (%) | R <sup>2</sup> |
|--------|-------------|-------------------|-----|-------------|-----------------------|--------------------|---------------------------------------------------|---------------------------------------------------|---------------------------------------------------|----------------------------------------|-------------------|----------------|
| 1      |             | NaCl              | 5.5 | 1           | 10                    | 1                  | 8.293                                             | 3.564                                             | 0.0258                                            | 0.350                                  | 89.242            | 0.9986         |
| 2      |             | NaCl              | 5.5 | 10          | 10                    | 1                  | 9.703                                             | 4.453                                             | 0.0292                                            | 0.488                                  | 86.754            | 0.9984         |
| 3      |             | NaCl              | 7.5 | 1           | 10                    | 1                  | 9.210                                             | 4.060                                             | 0.0227                                            | 0.403                                  | 89.367            | 0.9981         |
| 4      |             | NaCl              | 7.5 | 10          | 10                    | 1                  | 9.906                                             | 4.614                                             | 0.0278                                            | 0.527                                  | 86.765            | 0.9985         |
| 5      |             | NaCl              | 9.5 | 1           | 10                    | 1                  | 10.000                                            | 4.512                                             | 0.0212                                            | 0.246                                  | 91.784            | 0.9979         |
| 6      |             | NaCl              | 9.5 | 10          | 10                    | 1                  | 10.000                                            | 4.441                                             | 0.0284                                            | 0.443                                  | 87.454            | 0.9987         |
| 7      |             | NaCl              | 5.5 | 1           | 10                    | 0.5                | 8.382                                             | 3.765                                             | 0.0282                                            | 0.470                                  | 87.195            | 0.9988         |
| 8      | PS NPs-24   | NaCl              | 5.5 | 10          | 10                    | 0.5                | 5.236                                             | 2.262                                             | 0.0702                                            | 0.660                                  | 76.816            | 0.9970         |
| 9      |             | NaCl              | 5.5 | 1           | 10                    | 2                  | 9.882                                             | 4.343                                             | 0.0191                                            | 0.283                                  | 91.625            | 0.9984         |
| 10     |             | NaCl              | 5.5 | 10          | 10                    | 2                  | 9.941                                             | 4.422                                             | 0.0234                                            | 0.308                                  | 90.361            | 0.9988         |
| 11     |             | NaCl              | 5.5 | 1           | 5                     | 1                  | 9.998                                             | 4.366                                             | 0.0229                                            | 0.452                                  | 88.870            | 0.9983         |
| 12     |             | NaCl              | 5.5 | 10          | 5                     | 1                  | 7.817                                             | 3.248                                             | 0.0375                                            | 0.625                                  | 83.235            | 0.9985         |
| 13     |             | NaCl              | 5.5 | 1           | 20                    | 1                  | 9.117                                             | 4.093                                             | 0.0199                                            | 0.318                                  | 91.012            | 0.9980         |
| 14     |             | NaCl              | 5.5 | 10          | 20                    | 1                  | 9.793                                             | 4.185                                             | 0.0307                                            | 0.354                                  | 88.256            | 0.9979         |
| 15     |             | CaCl <sub>2</sub> | 5.5 | 1           | 10                    | 1                  | 10.000                                            | 4.361                                             | 0.0394                                            | 0.892                                  | 80.595            | 0.9961         |
| 16     |             | CaCl <sub>2</sub> | 5.5 | 10          | 10                    | 1                  | NA                                                | NA                                                | NA                                                | NA                                     | 22.702            | 0.9907*        |

69

70

## 71 Figures

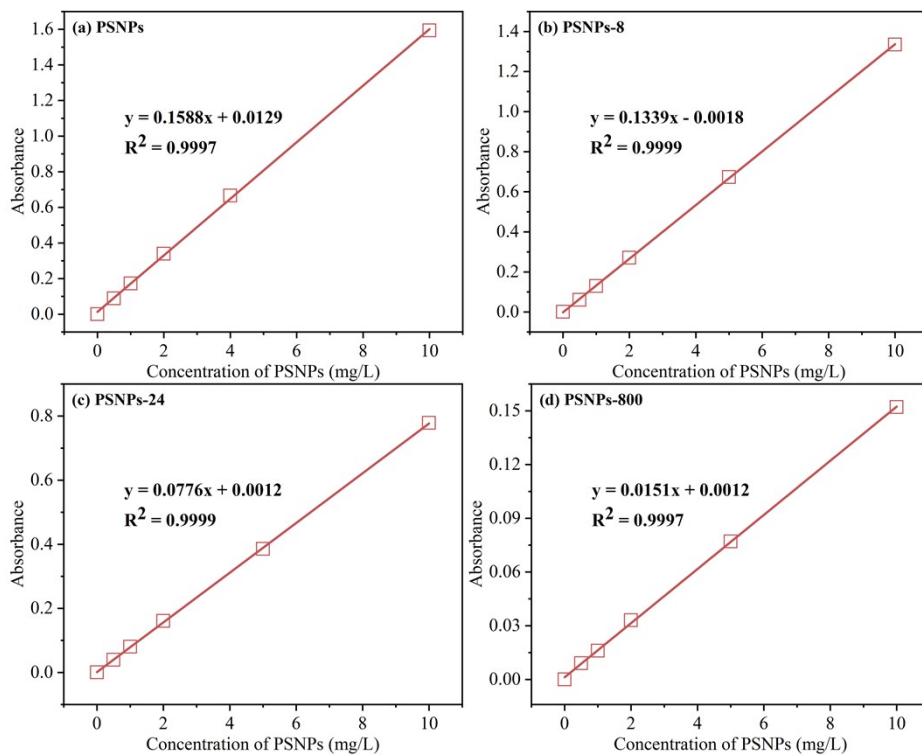

72

73 Fig. S1. Standard curves for PS NPs (a), PS NPs-8 (b), PS NPs-24 (c) and PS NPs-

74 800 (d)

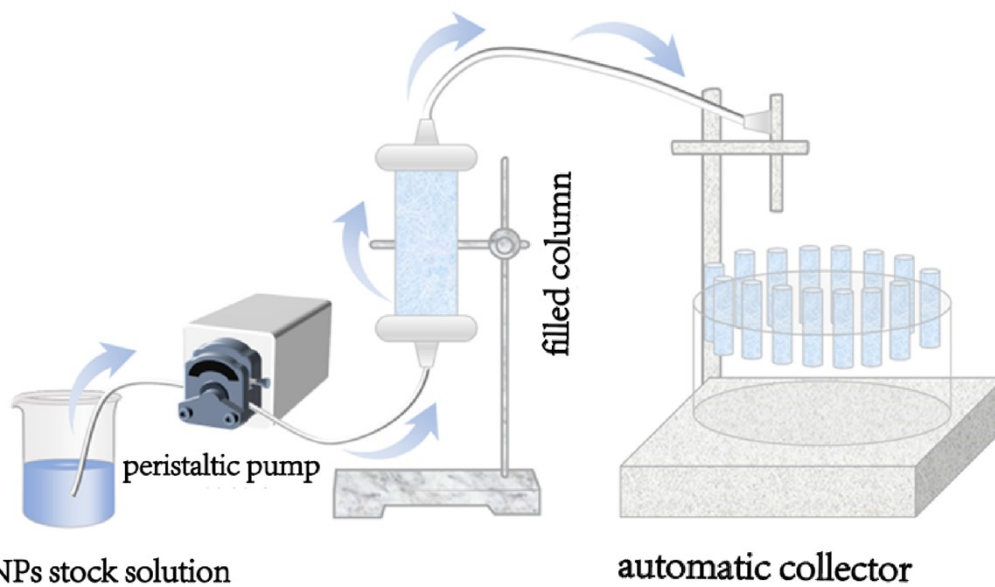

75

76 Fig. S2. Schematic diagram of the column transport experiments.

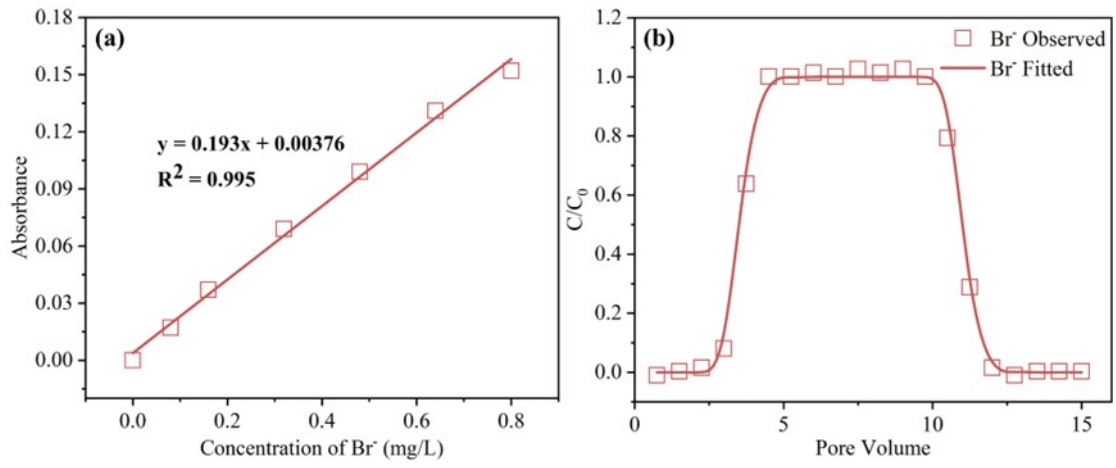

77

78 Fig. S3. Standard curve (a) and breakthrough curve (b) for Br in saturated quartz sand

79 columns

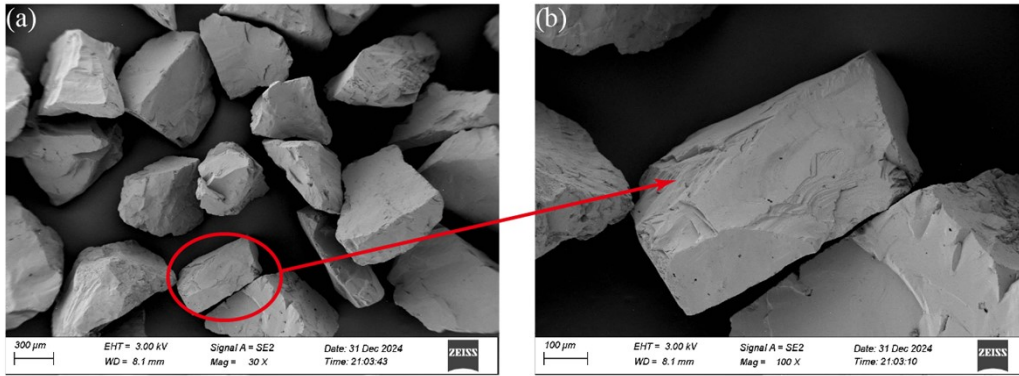

80

81 Fig. S4. SEM images of quartz sand (a-b)
